# Supplementary material
Source: Springer Nature journal article supplement (https://www.springermedizin.de/resource/supplementary/12958_2012_1058_MOESM7_ESM.pdf/9566854)

(A)

*ISG15**MX1**MX2**OAS1*

All

G

M

L

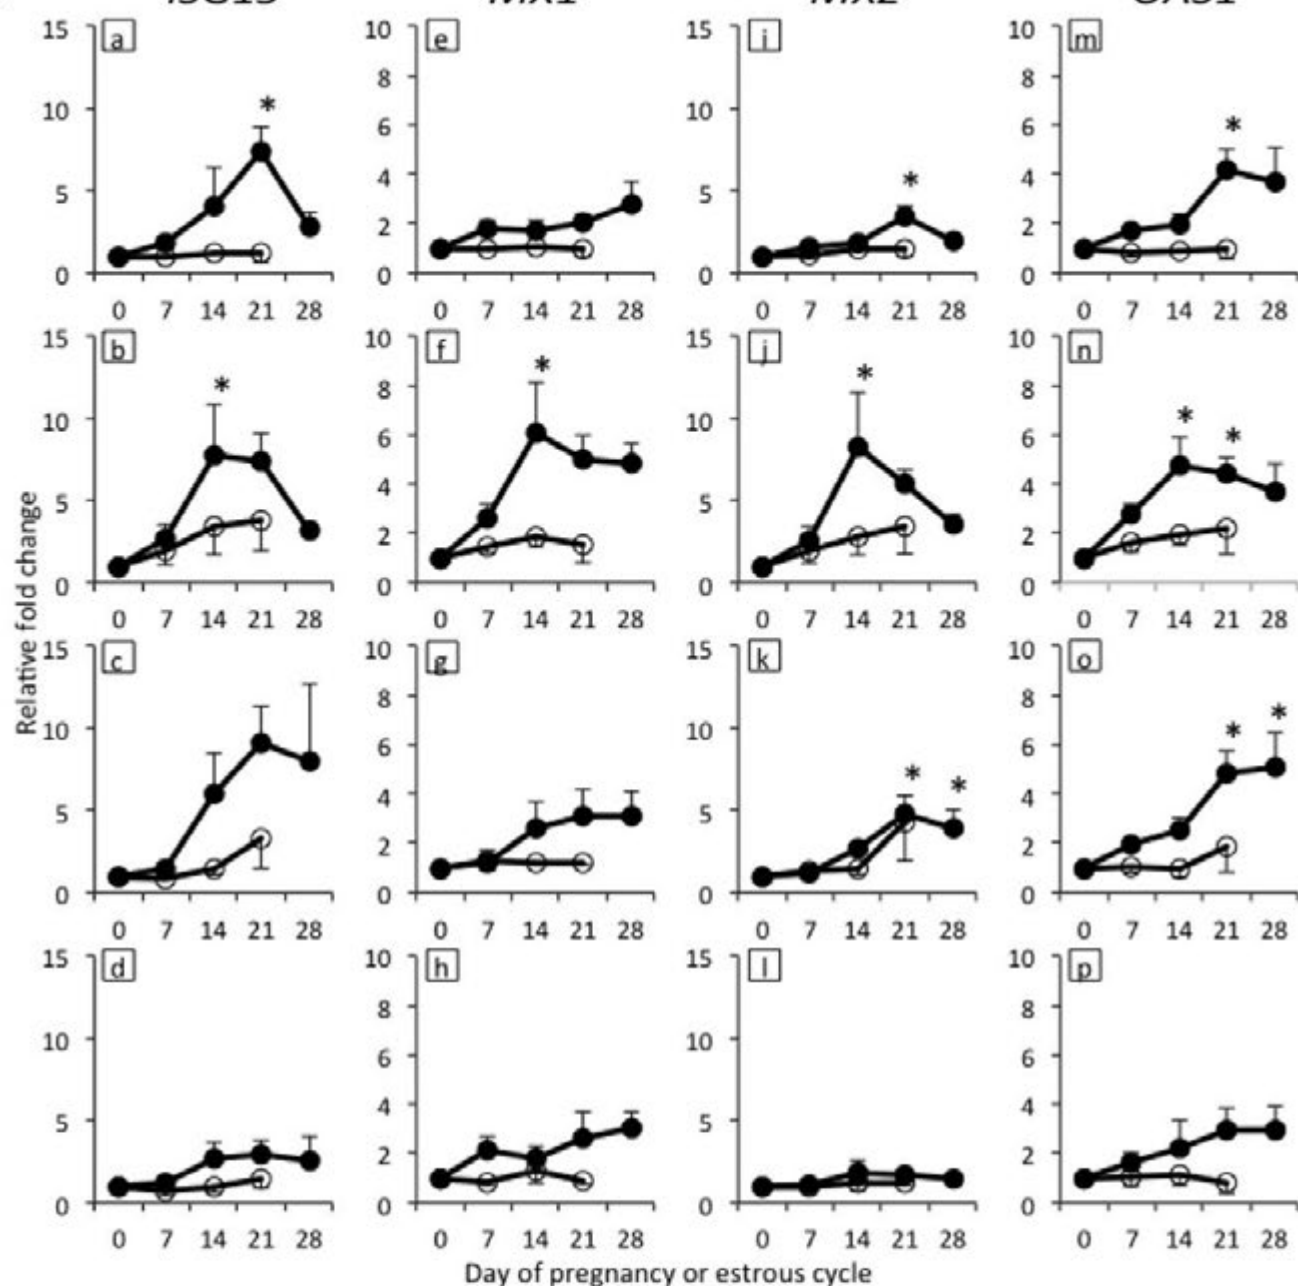

(B)

*ISG15**MX1**MX2**OAS1*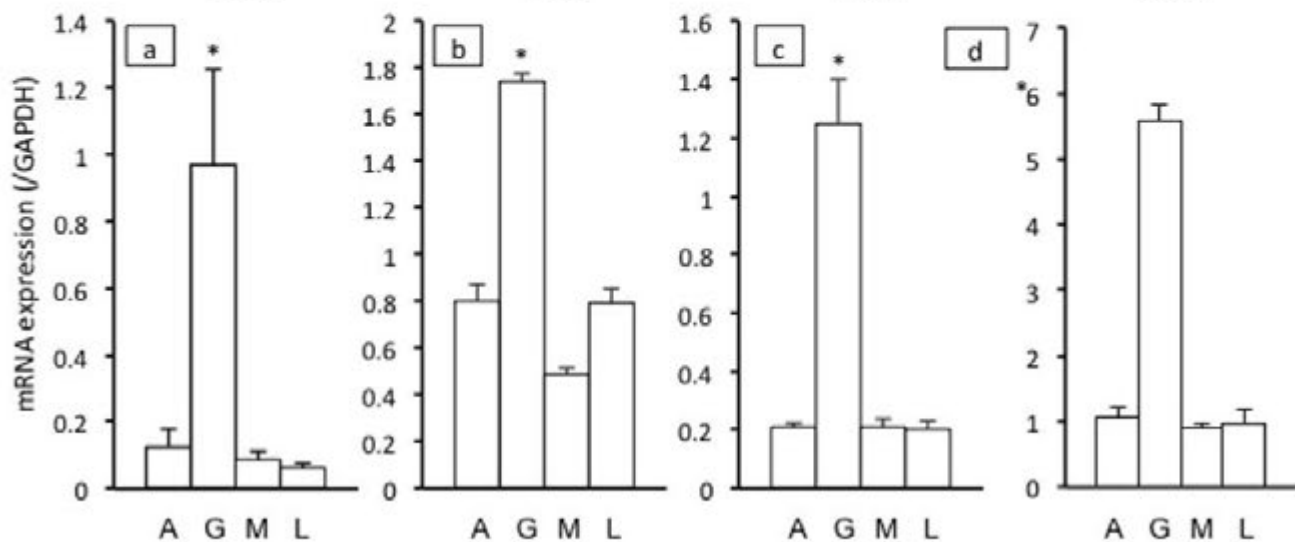

Supplement: MOESM7 [file 9566854]
